# Supplementary material for: Atomically ordered Rh2P catalysts anchored within hollow mesoporous carbon for efficient hydrogen production
Source: Royal Society of Chemistry journal article supplement (doi:10.1039/d1cc05267e), 2021-01-01
Supplement: d1cc05267e1.pdf [file d1cc05267e1.pdf]

**Supplementary Information for**

**Atomically ordered Rh<sub>2</sub>P catalysts anchored within hollow mesoporous carbon for efficient hydrogen production**

Xuwen Guo,<sup>a</sup> Xin Chen,<sup>b</sup> Yanping Huang,<sup>c</sup> Xiaowen Min,<sup>d</sup> Chuncai Kong,<sup>\*5</sup> Yawen Tang,<sup>a</sup> and Ben Liu<sup>\*d</sup>

<sup>a</sup>Jiangsu Key Laboratory of New Power Batteries, Jiangsu Collaborative Innovation Center of Biomedical Functional Materials, School of Chemistry and Materials Science, Nanjing Normal University, Nanjing 210023, China

<sup>b</sup>ME Instruments Inc., Huahan science and Technology Industrial Park, Shenzhen 518118, China

<sup>c</sup>Center of Engineering Experimental Teaching, School of Chemical Engineering, Sichuan University, Chengdu 610065, China

<sup>d</sup>Key Laboratory of Green Chemistry and Technology of Ministry of Education, College of Chemistry, Sichuan University, Chengdu 610064, China

<sup>e</sup>Ministry of Education Key Laboratory for Non-equilibrium Synthesis and Modulation of Condensed Matter, Shaanxi Province Key Laboratory of Advanced Functional Materials and Mesoscopic Physics, School of Physics, Xi'an Jiaotong University, Xi'an 710049, China

## Materials and Methods

### Materials and Chemicals

Ammonium hexachlororhodate ( $(\text{NH}_4)_2\text{RhCl}_6$ ), commercial Rh/C, *p*-nitrophenol, and deuterium water ( $\text{D}_2\text{O}$ ) were obtained from Alfa Aesar. Tetrapropyl orthosilicate (TPOS), resorcinol, ammonia borane (AB), and formaldehyde were purchased from Shanghai Macklin Biochemical Co., Ltd. Ethanol,  $\text{NH}_3\cdot\text{H}_2\text{O}$  (25%), sodium hypophosphite ( $\text{NaH}_2\text{PO}_2$ ), sodium borohydride ( $\text{NaBH}_4$ ), sodium hydroxide (NaOH), hydrofluoric (HF), and urea were obtained from Sinopharm Chemical Reagent Co. Ltd. All the reagents are of analytical reagent grade and used without further purification. Deionized  $\text{H}_2\text{O}$  with the resistivity of 18.25  $\text{m}\Omega$  was used in all experiments.

### Synthesis of nitrogen-functionalized Hollow mesoporous carbon (HMC)

Nitrogen-functionalized hollow mesoporous carbon (HMC) was synthesized through a template-free route according to the reported method with a modification (*ACS Nano* **2016**, *10*, 4579). In a typical synthesis, 17.3 mL of TPOS was injected in the mixed solution containing 350 mL of ethanol, 30 mL of  $\text{H}_2\text{O}$ , and 15 mL of  $\text{NH}_3\cdot\text{H}_2\text{O}$  (25%). After stirring for 15 min, 2 g of resorcinol, 200 mg of urea, and 2.8 mL of formaldehyde were added. After stirring for another 24 h, the powder was collected by centrifugation and further washed with water/ethanol for several times. The samples were then carbonized at 700 °C for 5 h under  $\text{N}_2$  and washed with HF to remove silica. The HMCs were finally dried at 50 °C before use.

### Synthesis of Rh@HMC and Rh<sub>2</sub>P@HMC

In a typical synthesis of Rh@HMC, 0.30 g of as-made HMC was slowly dipped in 4.0 mL of 10.0 mM  $(\text{NH}_4)_2\text{RhCl}_6$  and further stirred for 12 h. After that, the powder was washed several times with water/ethanol and dried at 50 °C overnight. Then, obtained powder was moved into a tube furnace and calcined at 700 °C for 5 h under a  $\text{H}_2/\text{N}_2$  atmosphere (5:95). After be washed with HF to remove silica, Rh@HMC was accordingly obtained by drying at 50 °C for 12 h. By contrast, Rh<sub>2</sub>P@HMC was synthesized by direct solid-phase phosphorylation of Rh@HMC with  $\text{NaH}_2\text{PO}_2$ . Typically, 0.30 g of Rh@HMC was physically mixed with 0.60 g of  $\text{NaH}_2\text{PO}_2$  and further calcined in a tube furnace under 350 °C for 3 h under a  $\text{H}_2/\text{N}_2$  atmosphere (5:95). After be washed by diluted HCl and water/ethanol for 3 times, Rh<sub>2</sub>P@HMC was obtained finally.

### Electrocatalytic hydrogen evolution reaction (HER)

Electrocatalytic studies were carried out on a CHI 660E electrochemical analyser at 25 °C according to our previous works (*Inorg. Chem.* **2021**, *60*, 4380; *Appl. Catal. B Environ.* **2018**, *238*, 525). Typically, a nanocatalyst

ink was prepared by adding 5.0 mg of nanocatalysts to 1.0 mL of ethanol/DI H<sub>2</sub>O (8:2 by volume). After sonicating for > 30 min, 50  $\mu$ L of Nafion solution was mixed and further sonicated for an additional 30 min. Then, 6.0  $\mu$ L of the ink solution ( $\sim$ 6.0  $\mu$ g of the catalyst) was casted on GCE and dried at 40  $^{\circ}$ C before test. Linear sweep voltammetry (LSV) curves were obtained at 0.5 M H<sub>2</sub>SO<sub>4</sub> with a scan rate of 5 mV s<sup>-1</sup>, while cyclic voltammetry (CV) curves were collected at 0.5 M H<sub>2</sub>SO<sub>4</sub> with a scan rate of 50 mV s<sup>-1</sup>. All results were obtained by IR compensation and all reported potentials in this work were referenced to the reversible hydrogen electrode (RHE).

### **Catalytic dehydrogenation of AB**

Catalytic dehydrogenation of AB was carried out at ambient conditions (298 K) according to our previous works (*J. Phys. Chem. Lett.* **2019**, *10*, 7374; *J. Phys. Chem. Lett.* **2021**, *12*, 696). Typically, 10.0 mg of catalyst was first dispersed in 3.0 mL of H<sub>2</sub>O and further sonicated for 10 min. Then, dehydrogenation reaction of AB was started rapidly when injected 4.0 mL of 5.0 mg mL<sup>-1</sup> AB into above solution at 298 K. The volume of the generated H<sub>2</sub> was monitored by recording the displacement of water in the gas burette.

### **Tandem reaction coupled AB dehydrogenation and *p*-nitrophenol hydrogenation**

Typically, 1.0 mL of 0.10 mM *p*-nitrophenol and 1.0 mL of 30 mM AB were successively mixed in a quartz cuvette. Then, 0.05 mL of 0.20 mg mL<sup>-1</sup> Rh<sub>2</sub>P@HMC was injected above solution to start AB dehydrogenation and *p*-nitrophenol hydrogenation reactions simultaneously. Hydrogenation kinetics was collected by *in situ* Ultraviolet-visible (UV-vis) spectroscopy.

### **Characterizations**

SEM images were collected using a JEOL JSM-7610F field emission scanning electron microscope. TEM and STEM studies were carried out using a field emission transmission electron microscope (JEM-F200, JEOL Ltd., Japan) with an accelerating voltage of 200 kV. PXRD patterns were recorded on powder samples using a D/max 2500 VL/PC diffractometer (Japan) equipped with graphite-monochromatized Cu K $\alpha$  radiation in  $2\theta$  ranging from 30 $^{\circ}$  to 90 $^{\circ}$ . XPS was performed on a scanning X-ray microprobe (Thermo ESCALAB 250Xi) that uses Al K $\alpha$  radiation. ICP-MS was recorded on a NexION 350D. N<sub>2</sub> adsorption/desorption isotherms were measured at 77 K using an ASAP 2010 M+C analyzer.

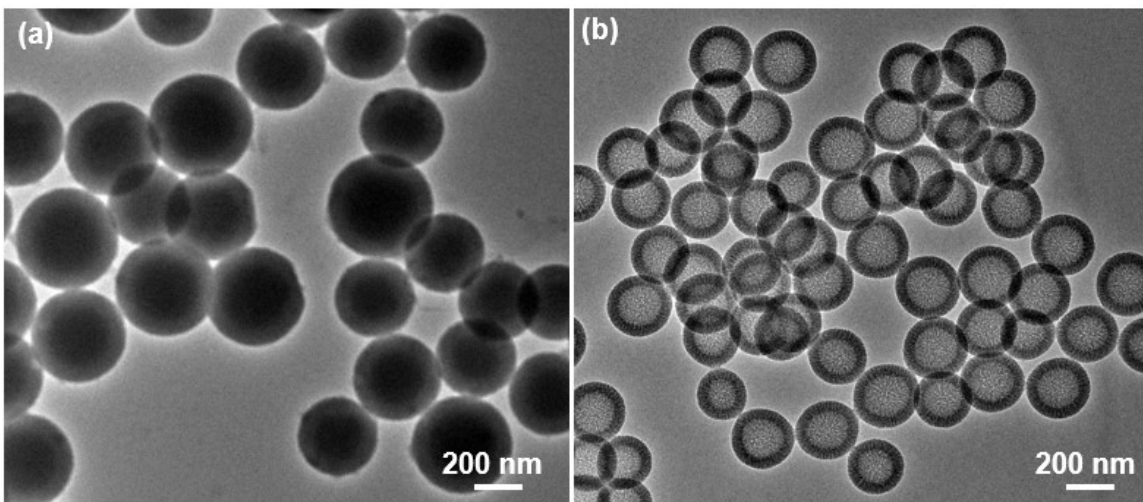

**Fig. S1** (a) TEM image of as-made nitrogen-functional HMC, indicating it composed of a silica core surrounded by a carbon shell. (b) TEM image of nitrogen-functional HMC, suggesting highly uniform and homogeneously dispersed nanostructure.

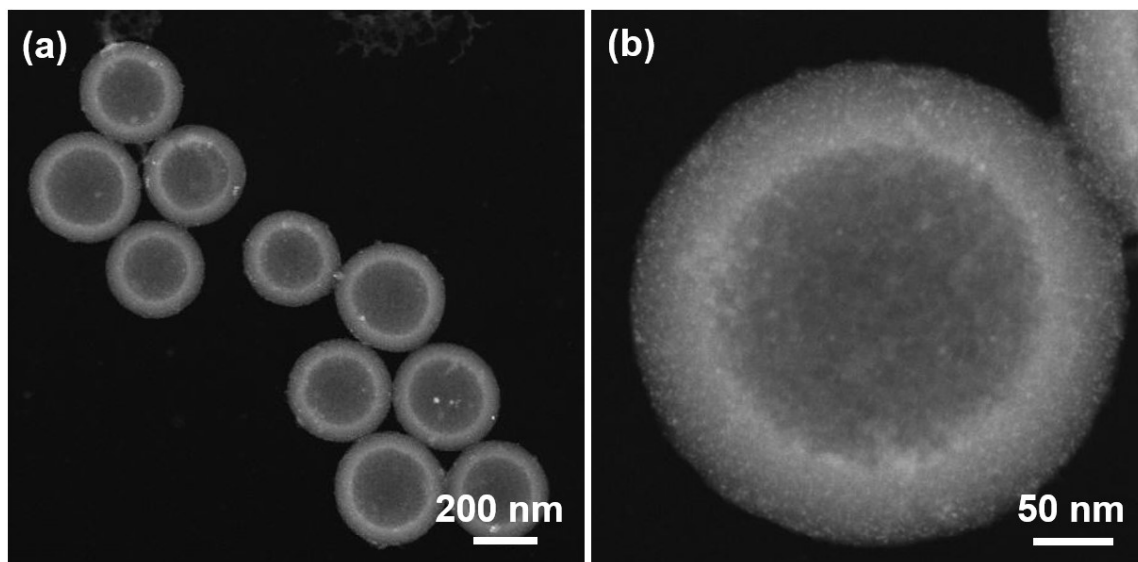

**Fig. S2** (a) Low-magnification and (b) high-magnification STEM images of Rh@HMC, confirming uniform Rh nanoclusters dispersed within mesoporous channels of HMCs.

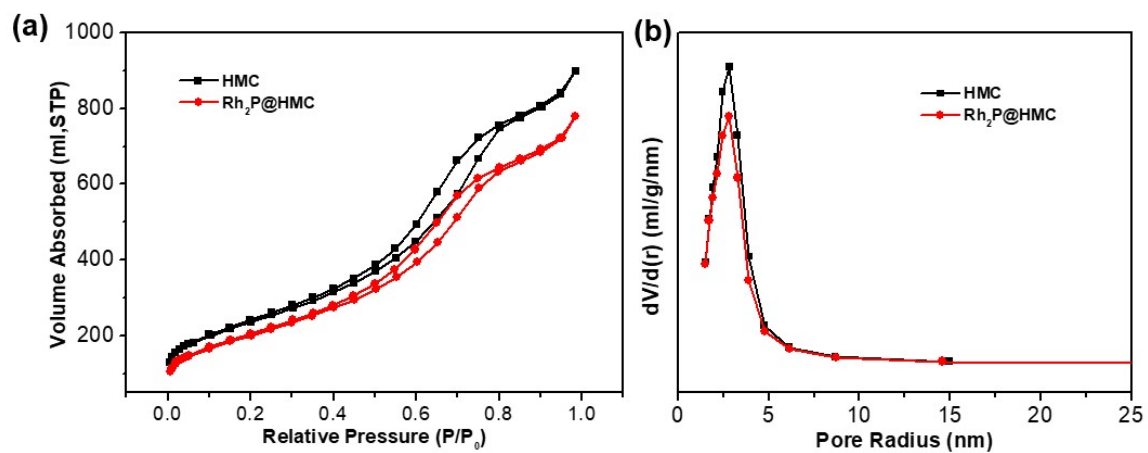

**Fig. S3** (a)  $N_2$  adsorption/desorption isotherms and (b) corresponding pore size distributions of HMC and  $Rh_2P@HMC$ .

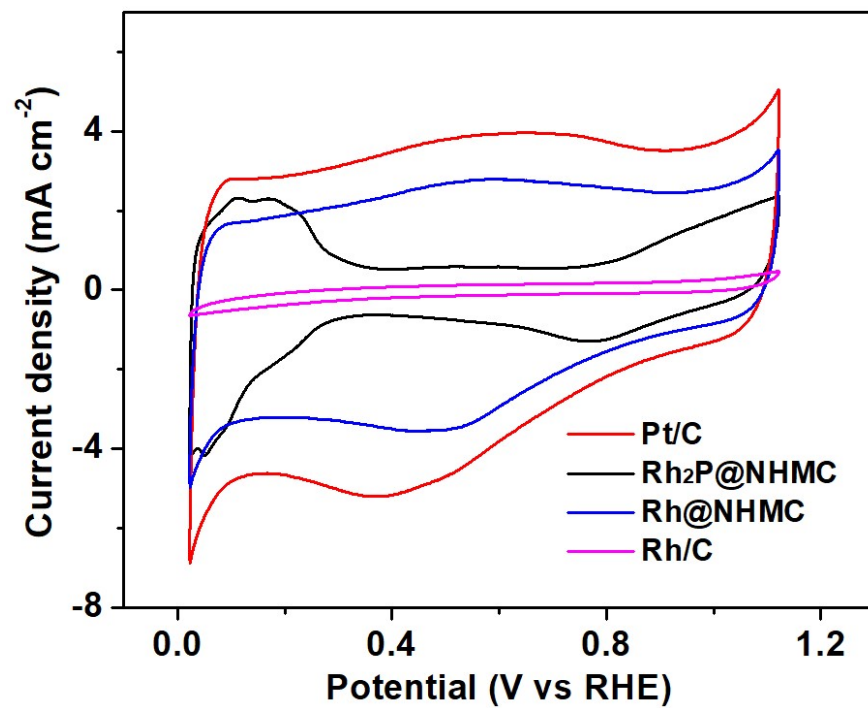

**Fig. S4** CV curves of Rh<sub>2</sub>P@HMC, Rh@HMC, commercial Rh/C and Pt/C, indicating they are electrocatalytically active for HER.

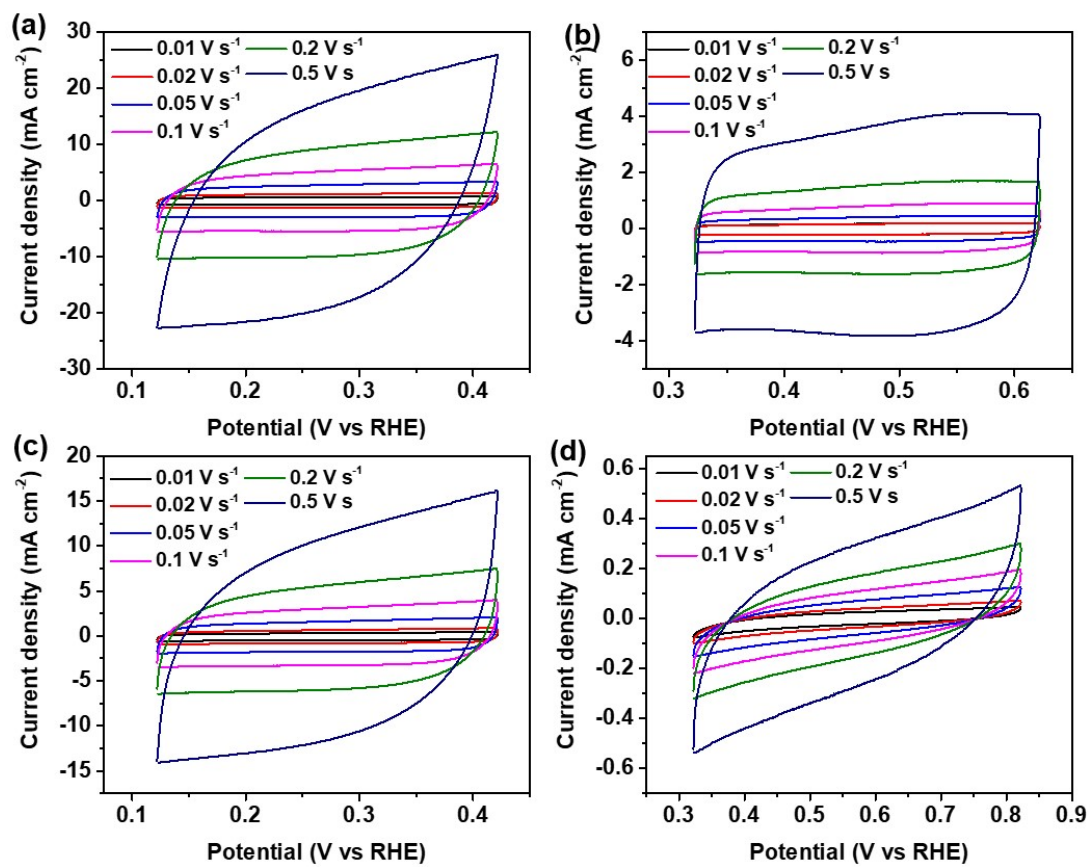

Fig. S5 CV curves of (a) Rh<sub>2</sub>P@HMC, (b) Pt/C, (c) Rh@HMC, and (d) Rh/C with different scan rates.



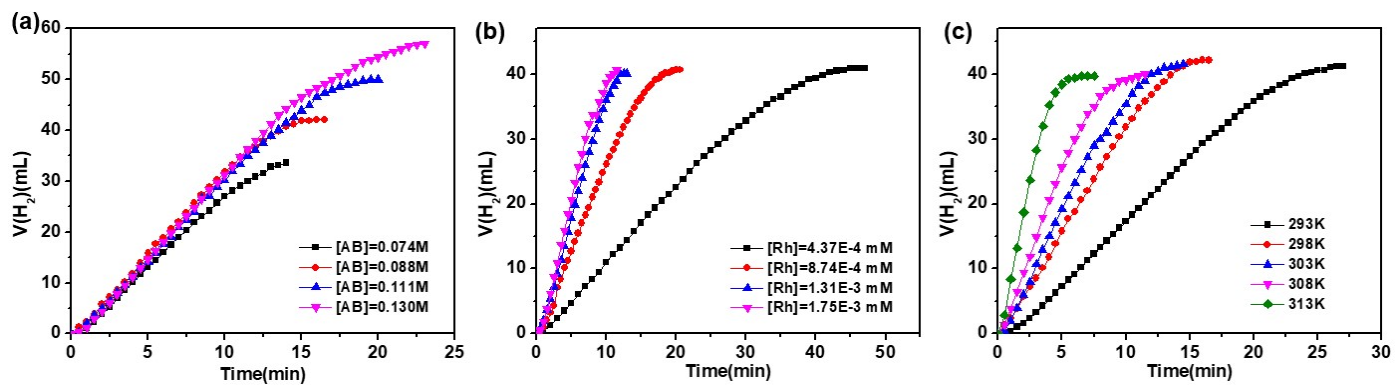

**Fig. S6** AB dehydrogenation dependance over Rh/C by (b) AB concentrations, (c) Rh concentrations, and (d) test temperatures.

**Table S1. Comparisons of catalytic activities of previously reported nanocatalysts and Rh<sub>2</sub>P@HMC in room-temperature AB dehydrogenation.**

| No. | Catalyst                                    | Temperature (°C) | TOF (mol <sub>H<sub>2</sub></sub> mol <sup>-1</sup> min <sup>-1</sup> ) | References                                                      |
|-----|---------------------------------------------|------------------|-------------------------------------------------------------------------|-----------------------------------------------------------------|
| 1   | RuP@NHMC                                    | 25               | 939<br>1663 (0.4 M NaOH)                                                | This work                                                       |
| 2   | Rh@ZSM-5-H                                  | 25               | 432                                                                     | <i>Angew. Chem. Int. Ed.</i> <b>2019</b> , <i>58</i> , 18570    |
| 3   | Rh/WO <sub>3-x</sub>                        | 25               | 535.7                                                                   | <i>Nanoscale Adv.</i> <b>2019</b> , <i>1</i> , 3941             |
| 4   | Rh/ATP-C                                    | 25               | 566                                                                     | <i>Nanoscale Adv.</i> <b>2020</b> , <i>2</i> , 1685             |
| 5   | Ru/CB                                       | 25               | 429.5                                                                   | <i>Int. J. Hydrogen Energy</i> <b>2012</b> , <i>37</i> , 17921  |
| 6   | Ru/graphene                                 | 25               | 325                                                                     | <i>Int. J. Hydrogen Energy</i> <b>2015</b> , <i>40</i> , 6180   |
| 7   | Ru/CeO <sub>2</sub>                         | 25               | 361                                                                     | <i>Dalton Trans.</i> <b>2016</b> , <i>45</i> , 10969            |
| 8   | Ru NPs@PCC                                  | 25               | 215                                                                     | <i>Chem</i> <b>2018</b> , <i>4</i> , 555                        |
| 9   | RuNi/p-g-C <sub>3</sub> N <sub>4</sub>      | 30               | 840.3                                                                   | <i>ACS Sustainable Chem. Eng.</i> <b>2020</b> , <i>8</i> , 8458 |
| 10  | Pt <sub>25</sub> @TiO <sub>2</sub>          | 25               | 311                                                                     | <i>Angew. Chem. Int. Ed.</i> <b>2016</b> , <i>55</i> , 12257    |
| 11  | Ni <sub>2</sub> Pt@ZIF-8                    | rt               | 600                                                                     | <i>J. Am. Chem. Soc.</i> <b>2018</b> , <i>140</i> , 10034       |
| 12  | Pt <sub>1</sub> Co <sub>1</sub> (Dendrimer) | 20               | 606                                                                     | <i>ACS Catal.</i> <b>2019</b> , <i>9</i> , 1110                 |
| 13  | PdCu/NA <sub>s</sub> 215                    | 25               | 72.9                                                                    | <i>Int. J. Hydrogen Energy</i> <b>2019</b> , <i>44</i> , 30226  |
